# Supplementary material for: Highly stable and biocompatible hyaluronic acid-rehabilitated nanoscale MOF-Fe2+induced ferroptosis in breast cancer cells
Source: Royal Society of Chemistry journal article supplement (doi:10.1039/d0tb01616k), 2020-01-01
Supplement: d0tb01616k1.pdf [file d0tb01616k1.pdf]

## Supporting Information

### **Highly Stable and Biocompatible Hyaluronic acid-rehabilitated nanoscale MOF-Fe<sup>2+</sup> Induced Ferroptosis in Breast Cancer Cells**

Xiang Xu <sup>a, b</sup>, Yiwei Chen <sup>b, c</sup>, Yongxin Zhang <sup>b</sup>, Yansheng Yao <sup>c\*</sup>, Peng Ji <sup>a\*</sup>

- a. Jiangsu Key Laboratory of Chiral Pharmaceuticals Biosynthesis, College of Pharmacy and Chemistry & Chemical Engineering, Taizhou University, Taizhou 225300, Jiangsu, China
- b. Key Laboratory of Modern Chinese Medicines, China Pharmaceutical University, Nanjing 210009, China.
- c. Department of Endocrinology, the Affiliated Taixing People's Hospital of Medical College, Yangzhou University, Taixing 225400, China

***Fe<sup>2+</sup> loading content measurement:*** 5 mg HA@MOF was dispersed in 5 mL pH 2 HCl solution under vigorous stirring. Then, the mixture was transferred into a 10 mL size volumetric flask and replenished to 10 mL with pH 2 HCl solution. After the mild shake, the solution was filtered with 0.45  $\mu$ m membranes and measured by the o-phenanthroline method to determine the Fe<sup>2+</sup> content.

***Fe<sup>2+</sup> validation:*** 20 mg of HA@MOF NPs were transferred to three beakers with 5 mL different phosphate-buffered saline (with pH 7.4, 6.5, and 5.0). Afterward, the beakers were sealed and vigorously stirred for 1 h. Then, several drops from each beaker were withdrawn and dripped into the o-phenanthroline solution. The appearance was recorded after the gentle shake.

***Fluorescence spectrums:*** FITC loaded MOF and HA@MOF NPs were prepared and dispersed in the same amount of deionized water. Then, both dispersions were scanned under a fixed excitation wavelength of 495 nm via Cary Eclipse Fluorescence Spectrophotometer (Agilent Technologies).

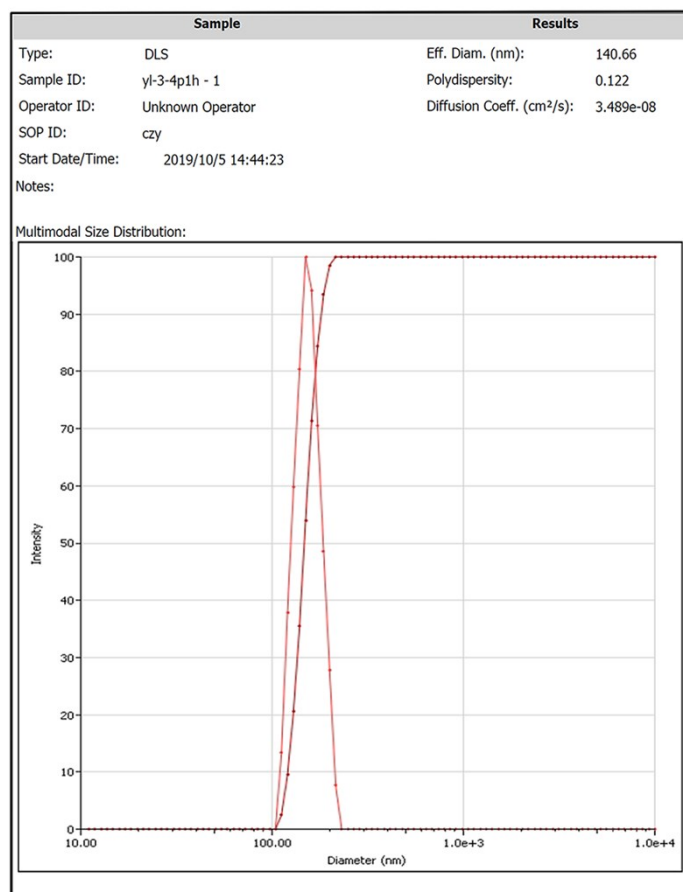

**Fig. S1.** Original DLS report of HA@MOF

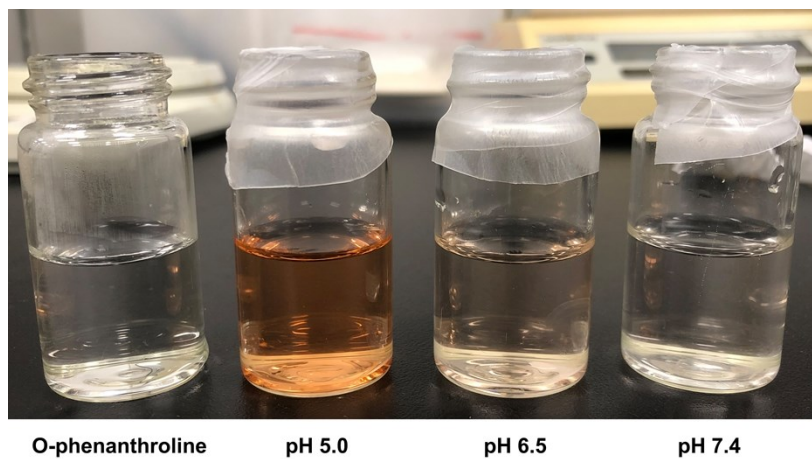

**Fig. S2.** Fe<sup>2+</sup> validation: Red-brown color represents the Fe<sup>2+</sup>- phenanthroline complex.

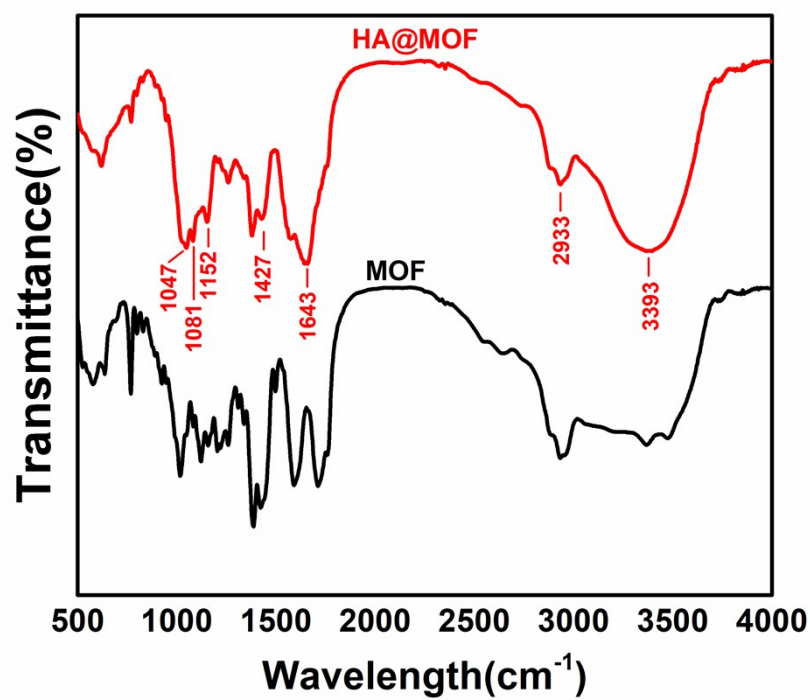

Fig. S3. FTIR results of MOF and HA@MOF

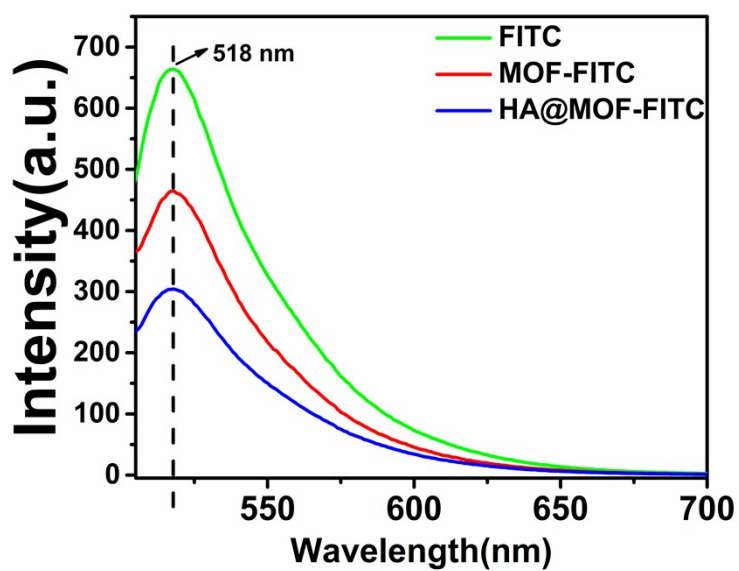

Fig. S4. Fluorescence spectrums of FITC, MOF-FITC, and HA@MOF-FITC.

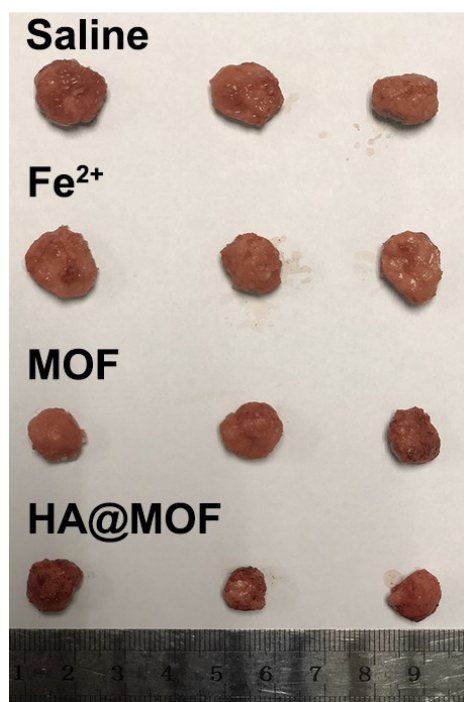

**Fig. S5.** *In vivo* anti-tumor efficacy: Pictures of excised tumors from tested mice.
